# Supplementary material for: Hunting the Best Opportunity Through the Arrow of General Decision-Making Styles: Unfolding the Role of Social Capital and Entrepreneurial Intention
Source: Frontiers journal article supplement (doi:10.3389/fpsyg.2022.814424), 2022-03-03
Supplement: Data_Sheet_1.pdf [file Data_Sheet_1.pdf]

## Appendix

| S.N                                       | Code   | Questions                                                                                                                | SD | D | N | A | SA |
|-------------------------------------------|--------|--------------------------------------------------------------------------------------------------------------------------|----|---|---|---|----|
| <b>General Decision-Making Style GDMS</b> |        |                                                                                                                          |    |   |   |   |    |
| <i>Rational</i>                           |        |                                                                                                                          |    |   |   |   |    |
| 1                                         | GDMS1  | I double-check my information sources to be sure I have the right facts before making a decision.                        | 1  | 2 | 3 | 4 | 5  |
| 2                                         | GDMS2  | I make decisions in a logical and systematic way.                                                                        | 1  | 2 | 3 | 4 | 5  |
| 3                                         | GDMS3  | My decision making requires careful thought.                                                                             | 1  | 2 | 3 | 4 | 5  |
| 4                                         | GDMS4  | When making a decision, I consider various options in terms of a specific goal.                                          | 1  | 2 | 3 | 4 | 5  |
| <i>Intuitive</i>                          |        |                                                                                                                          |    |   |   |   |    |
| 5                                         | GDMS5  | When making a decision, I rely upon my instincts.                                                                        | 1  | 2 | 3 | 4 | 5  |
| 6                                         | GDMS6  | When I make decisions, I tend to rely on my intuition.                                                                   | 1  | 2 | 3 | 4 | 5  |
| 7                                         | GDMS7  | I generally make decisions that feel right to me.                                                                        | 1  | 2 | 3 | 4 | 5  |
| 8                                         | GDMS8  | When I make a decision, it is more important for me to feel the decision is right than to have a rational reason for it. | 1  | 2 | 3 | 4 | 5  |
| <i>Dependent</i>                          |        |                                                                                                                          |    |   |   |   |    |
| 9                                         | GDMS9  | I often need the assistance of other people when making important decisions.                                             | 1  | 2 | 3 | 4 | 5  |
| 10                                        | GDMS10 | I rarely make important decisions without consulting other people.                                                       | 1  | 2 | 3 | 4 | 5  |
| 11                                        | GDMS11 | If I have the support of others, it is easier for me to make important decisions.                                        | 1  | 2 | 3 | 4 | 5  |
| 12                                        | GDMS12 | I use the advice of other people in making my important decisions.                                                       | 1  | 2 | 3 | 4 | 5  |
| <i>Avoidant</i>                           |        |                                                                                                                          |    |   |   |   |    |
| 13                                        | GDMS13 | I avoid making important decisions until the pressure is on.                                                             | 1  | 2 | 3 | 4 | 5  |
| 14                                        | GDMS14 | I postpone decision making whenever possible.                                                                            | 1  | 2 | 3 | 4 | 5  |
| 15                                        | GDMS15 | I often procrastinate when it comes to making important decisions.                                                       | 1  | 2 | 3 | 4 | 5  |
| 16                                        | GDMS16 | I generally make important decisions at the last minute.                                                                 | 1  | 2 | 3 | 4 | 5  |
| <i>Spontaneous</i>                        |        |                                                                                                                          |    |   |   |   |    |
| 17                                        | GDMS17 | I generally make snap decisions.                                                                                         | 1  | 2 | 3 | 4 | 5  |
| 18                                        | GDMS18 | I often make decisions on the spur of the moment.                                                                        | 1  | 2 | 3 | 4 | 5  |
| 19                                        | GDMS19 | I make quick decisions.                                                                                                  | 1  | 2 | 3 | 4 | 5  |
| 20                                        | GDMS20 | I often make impulsive decisions.                                                                                        | 1  | 2 | 3 | 4 | 5  |
| <b>Entrepreneurial Intention</b>          |        |                                                                                                                          |    |   |   |   |    |
| 21                                        | EI1    | Make every effort to start and run own firm.                                                                             | 1  | 2 | 3 | 4 | 5  |
| 22                                        | EI2    | Professional goal is to become entrepreneur.                                                                             | 1  | 2 | 3 | 4 | 5  |
| 23                                        | EI3    | Determined to create a firm.                                                                                             | 1  | 2 | 3 | 4 | 5  |
| 24                                        | EI4    | Ready to do anything to be entrepreneur.                                                                                 | 1  | 2 | 3 | 4 | 5  |
| 25                                        | EI5    | Very serious thought of starting a firm.                                                                                 | 1  | 2 | 3 | 4 | 5  |
| <b>Social Capital</b>                     |        |                                                                                                                          |    |   |   |   |    |
| 26                                        | SC1    | Staffs engage in open and honest communication with one another.                                                         | 1  | 2 | 3 | 4 | 5  |
| 27                                        | SC2    | Cross-departmental working is important in driving service improvement.                                                  | 1  | 2 | 3 | 4 | 5  |
| 28                                        | SC3    | Staffs keep each other informed at all times.                                                                            | 1  | 2 | 3 | 4 | 5  |
| 29                                        | SC4    | There is a high level of trust between officers.                                                                         | 1  | 2 | 3 | 4 | 5  |
| 30                                        | SC5    | Workers share the same ambitions and vision for the company.                                                             | 1  | 2 | 3 | 4 | 5  |
| 31                                        | SC6    | The authority's mission, values, and objectives are clearly and widely                                                   | 1  | 2 | 3 | 4 | 5  |

|                              |     |                                                                                              |   |   |   |   |   |
|------------------------------|-----|----------------------------------------------------------------------------------------------|---|---|---|---|---|
|                              |     | understood and owned by all staff in the service.                                            |   |   |   |   |   |
| <b>Opportunity Discovery</b> |     |                                                                                              |   |   |   |   |   |
| 32                           | OD1 | I discover entrepreneurial opportunities that exist in my industry.                          | 1 | 2 | 3 | 4 | 5 |
| 33                           | OD2 | I discover previously unnoticed entrepreneurial opportunities.                               | 1 | 2 | 3 | 4 | 5 |
| 34                           | OD3 | I am excited by the knowledge that there are many unexploited entrepreneurial opportunities. | 1 | 2 | 3 | 4 | 5 |
| 35                           | OD4 | I undertake methods and solutions to product problems that build on my experience.           | 1 | 2 | 3 | 4 | 5 |
| 36                           | OD5 | I searched for product information and ideas that took the firm into existing product areas. | 1 | 2 | 3 | 4 | 5 |
| <b>Opportunity Creation</b>  |     |                                                                                              |   |   |   |   |   |
| 37                           | OC1 | I am attracted by the idea of breaking away from routine activity.                           | 1 | 2 | 3 | 4 | 5 |
| 38                           | OC2 | I like to discover new ways of doing things.                                                 | 1 | 2 | 3 | 4 | 5 |
| 39                           | OC3 | I prefer to find new uses for existing products.                                             | 1 | 2 | 3 | 4 | 5 |
| 40                           | OC4 | I am a source of innovative ideas.                                                           | 1 | 2 | 3 | 4 | 5 |
| 41                           | OC5 | I collect information on totally new products.                                               | 1 | 2 | 3 | 4 | 5 |
| 42                           | OC6 | I search for product information involving experimentation and high risk.                    | 1 | 2 | 3 | 4 | 5 |
